# Supplementary material
Source: HighWire-hosted journal article supplement (https://gh.bmj.com/content/5/5/e002287)
Supplement: inline-supplementary-material-2 [file inline-supplementary-material-2.pdf]

**Appendix 2:** A three-step framework for evaluating regulatory protections for clinical research that are under consideration (ie, not yet implemented).

| Guiding question                                                               | Concrete tasks                                                                                                                                                                                                                                                                                                                                                                                                                                                                                                                                                                                                                                                                                                                                                                                                                                                                                                                                                                                                                                                                                                                                                                                                                                                                                                                                                                                                                                                                                                                                                                                                                                                                                                                                                                                                                                                                                                                                                                                                                                                                                                                                                                                                                                                                                                                                                                                                                                                                                                                                                                                                                                                                                                                                                                                                                     |                       |                                                                                                                                                             |                                                                                                        |                                                                                                                                                                          |                                                                   |                                                             |                                                                                                               |                                                    |                                                       |                                                         |                                                                                                                 |          |                                                              |                                                                                                        |
|--------------------------------------------------------------------------------|------------------------------------------------------------------------------------------------------------------------------------------------------------------------------------------------------------------------------------------------------------------------------------------------------------------------------------------------------------------------------------------------------------------------------------------------------------------------------------------------------------------------------------------------------------------------------------------------------------------------------------------------------------------------------------------------------------------------------------------------------------------------------------------------------------------------------------------------------------------------------------------------------------------------------------------------------------------------------------------------------------------------------------------------------------------------------------------------------------------------------------------------------------------------------------------------------------------------------------------------------------------------------------------------------------------------------------------------------------------------------------------------------------------------------------------------------------------------------------------------------------------------------------------------------------------------------------------------------------------------------------------------------------------------------------------------------------------------------------------------------------------------------------------------------------------------------------------------------------------------------------------------------------------------------------------------------------------------------------------------------------------------------------------------------------------------------------------------------------------------------------------------------------------------------------------------------------------------------------------------------------------------------------------------------------------------------------------------------------------------------------------------------------------------------------------------------------------------------------------------------------------------------------------------------------------------------------------------------------------------------------------------------------------------------------------------------------------------------------------------------------------------------------------------------------------------------------|-----------------------|-------------------------------------------------------------------------------------------------------------------------------------------------------------|--------------------------------------------------------------------------------------------------------|--------------------------------------------------------------------------------------------------------------------------------------------------------------------------|-------------------------------------------------------------------|-------------------------------------------------------------|---------------------------------------------------------------------------------------------------------------|----------------------------------------------------|-------------------------------------------------------|---------------------------------------------------------|-----------------------------------------------------------------------------------------------------------------|----------|--------------------------------------------------------------|--------------------------------------------------------------------------------------------------------|
| 1. Do the regulatory protections have a sound ethical rationale?               | <p>Determine whether the regulatory protections are <i>prima facie</i> ethically defensible.</p> <p>Specifically, consider whether the protections are consistent with widely accepted ethical standards for clinical research; whether they protect participants' rights and interests; and whether the protections meet other ethical criteria, such as a just and fair distribution of research benefits and burdens.</p> <p>A negative answer to all these questions provides a strong indication that the protections should be revised or revoked. Otherwise, the next steps of the framework should be followed.</p>                                                                                                                                                                                                                                                                                                                                                                                                                                                                                                                                                                                                                                                                                                                                                                                                                                                                                                                                                                                                                                                                                                                                                                                                                                                                                                                                                                                                                                                                                                                                                                                                                                                                                                                                                                                                                                                                                                                                                                                                                                                                                                                                                                                                        |                       |                                                                                                                                                             |                                                                                                        |                                                                                                                                                                          |                                                                   |                                                             |                                                                                                               |                                                    |                                                       |                                                         |                                                                                                                 |          |                                                              |                                                                                                        |
| 2. What are the benefits and costs of implementing the regulatory protections? | <p>Foresee all the relevant potential effects of implementing the regulatory protections.</p> <p>Specifically, estimate systematically who might benefit from the protections and who might incur costs, including how significant the estimated benefits and costs are. Would the affected people fare better or worse if the protections were introduced, as compared to how they would fare if the protections were not introduced?</p> <p>Be sure to consider the potential benefits and costs for everyone affected, based on the list provided below. (Note that listed potential benefits can turn into potential costs when a given regulatory protection leads to a decline in clinical research activity and, consequently, to forgone benefits; conversely, listed potential costs can turn into potential benefits.)</p> <table border="1" data-bbox="558 932 1751 1403"> <tbody> <tr> <td data-bbox="558 932 701 1344" rowspan="10">Research participants</td> <td data-bbox="701 932 1751 987">Potential clinical benefits from the research intervention (during and after the trial if post-trial access to proven beneficial interventions is provided)</td> </tr> <tr> <td data-bbox="701 987 1751 1019">Potential clinical benefits from improved clinical care as part of the research ("inclusion benefits")</td> </tr> <tr> <td data-bbox="701 1019 1751 1075">Potential clinical benefits from ancillary care (eg, following up on diagnoses made based on research tests, treating conditions that are unrelated to the study's aims)</td> </tr> <tr> <td data-bbox="701 1075 1751 1107">Potential clinical costs or harms (eg, research-related injuries)</td> </tr> <tr> <td data-bbox="701 1107 1751 1140">Potential psychological benefits (eg, feelings of altruism)</td> </tr> <tr> <td data-bbox="701 1140 1751 1195">Potential psychological costs (eg, anxiety from undergoing research procedures or receiving research results)</td> </tr> <tr> <td data-bbox="701 1195 1751 1227">Potential social benefits (eg, social recognition)</td> </tr> <tr> <td data-bbox="701 1227 1751 1260">Potential social costs (eg, stigma or discrimination)</td> </tr> <tr> <td data-bbox="701 1260 1751 1292">Potential financial benefits from monetary compensation</td> </tr> <tr> <td data-bbox="701 1292 1751 1344">Potential financial costs (eg, transportation costs, lost wages, treatment costs for research-related injuries)</td> </tr> <tr> <td data-bbox="558 1344 701 1403" rowspan="2">Patients</td> <td data-bbox="701 1344 1751 1377">Potential clinical benefits from access to new interventions</td> </tr> <tr> <td data-bbox="701 1377 1751 1403">Potential clinical benefits from research-related improvements in the quality of routine clinical care</td> </tr> </tbody> </table> | Research participants | Potential clinical benefits from the research intervention (during and after the trial if post-trial access to proven beneficial interventions is provided) | Potential clinical benefits from improved clinical care as part of the research ("inclusion benefits") | Potential clinical benefits from ancillary care (eg, following up on diagnoses made based on research tests, treating conditions that are unrelated to the study's aims) | Potential clinical costs or harms (eg, research-related injuries) | Potential psychological benefits (eg, feelings of altruism) | Potential psychological costs (eg, anxiety from undergoing research procedures or receiving research results) | Potential social benefits (eg, social recognition) | Potential social costs (eg, stigma or discrimination) | Potential financial benefits from monetary compensation | Potential financial costs (eg, transportation costs, lost wages, treatment costs for research-related injuries) | Patients | Potential clinical benefits from access to new interventions | Potential clinical benefits from research-related improvements in the quality of routine clinical care |
| Research participants                                                          | Potential clinical benefits from the research intervention (during and after the trial if post-trial access to proven beneficial interventions is provided)                                                                                                                                                                                                                                                                                                                                                                                                                                                                                                                                                                                                                                                                                                                                                                                                                                                                                                                                                                                                                                                                                                                                                                                                                                                                                                                                                                                                                                                                                                                                                                                                                                                                                                                                                                                                                                                                                                                                                                                                                                                                                                                                                                                                                                                                                                                                                                                                                                                                                                                                                                                                                                                                        |                       |                                                                                                                                                             |                                                                                                        |                                                                                                                                                                          |                                                                   |                                                             |                                                                                                               |                                                    |                                                       |                                                         |                                                                                                                 |          |                                                              |                                                                                                        |
|                                                                                | Potential clinical benefits from improved clinical care as part of the research ("inclusion benefits")                                                                                                                                                                                                                                                                                                                                                                                                                                                                                                                                                                                                                                                                                                                                                                                                                                                                                                                                                                                                                                                                                                                                                                                                                                                                                                                                                                                                                                                                                                                                                                                                                                                                                                                                                                                                                                                                                                                                                                                                                                                                                                                                                                                                                                                                                                                                                                                                                                                                                                                                                                                                                                                                                                                             |                       |                                                                                                                                                             |                                                                                                        |                                                                                                                                                                          |                                                                   |                                                             |                                                                                                               |                                                    |                                                       |                                                         |                                                                                                                 |          |                                                              |                                                                                                        |
|                                                                                | Potential clinical benefits from ancillary care (eg, following up on diagnoses made based on research tests, treating conditions that are unrelated to the study's aims)                                                                                                                                                                                                                                                                                                                                                                                                                                                                                                                                                                                                                                                                                                                                                                                                                                                                                                                                                                                                                                                                                                                                                                                                                                                                                                                                                                                                                                                                                                                                                                                                                                                                                                                                                                                                                                                                                                                                                                                                                                                                                                                                                                                                                                                                                                                                                                                                                                                                                                                                                                                                                                                           |                       |                                                                                                                                                             |                                                                                                        |                                                                                                                                                                          |                                                                   |                                                             |                                                                                                               |                                                    |                                                       |                                                         |                                                                                                                 |          |                                                              |                                                                                                        |
|                                                                                | Potential clinical costs or harms (eg, research-related injuries)                                                                                                                                                                                                                                                                                                                                                                                                                                                                                                                                                                                                                                                                                                                                                                                                                                                                                                                                                                                                                                                                                                                                                                                                                                                                                                                                                                                                                                                                                                                                                                                                                                                                                                                                                                                                                                                                                                                                                                                                                                                                                                                                                                                                                                                                                                                                                                                                                                                                                                                                                                                                                                                                                                                                                                  |                       |                                                                                                                                                             |                                                                                                        |                                                                                                                                                                          |                                                                   |                                                             |                                                                                                               |                                                    |                                                       |                                                         |                                                                                                                 |          |                                                              |                                                                                                        |
|                                                                                | Potential psychological benefits (eg, feelings of altruism)                                                                                                                                                                                                                                                                                                                                                                                                                                                                                                                                                                                                                                                                                                                                                                                                                                                                                                                                                                                                                                                                                                                                                                                                                                                                                                                                                                                                                                                                                                                                                                                                                                                                                                                                                                                                                                                                                                                                                                                                                                                                                                                                                                                                                                                                                                                                                                                                                                                                                                                                                                                                                                                                                                                                                                        |                       |                                                                                                                                                             |                                                                                                        |                                                                                                                                                                          |                                                                   |                                                             |                                                                                                               |                                                    |                                                       |                                                         |                                                                                                                 |          |                                                              |                                                                                                        |
|                                                                                | Potential psychological costs (eg, anxiety from undergoing research procedures or receiving research results)                                                                                                                                                                                                                                                                                                                                                                                                                                                                                                                                                                                                                                                                                                                                                                                                                                                                                                                                                                                                                                                                                                                                                                                                                                                                                                                                                                                                                                                                                                                                                                                                                                                                                                                                                                                                                                                                                                                                                                                                                                                                                                                                                                                                                                                                                                                                                                                                                                                                                                                                                                                                                                                                                                                      |                       |                                                                                                                                                             |                                                                                                        |                                                                                                                                                                          |                                                                   |                                                             |                                                                                                               |                                                    |                                                       |                                                         |                                                                                                                 |          |                                                              |                                                                                                        |
|                                                                                | Potential social benefits (eg, social recognition)                                                                                                                                                                                                                                                                                                                                                                                                                                                                                                                                                                                                                                                                                                                                                                                                                                                                                                                                                                                                                                                                                                                                                                                                                                                                                                                                                                                                                                                                                                                                                                                                                                                                                                                                                                                                                                                                                                                                                                                                                                                                                                                                                                                                                                                                                                                                                                                                                                                                                                                                                                                                                                                                                                                                                                                 |                       |                                                                                                                                                             |                                                                                                        |                                                                                                                                                                          |                                                                   |                                                             |                                                                                                               |                                                    |                                                       |                                                         |                                                                                                                 |          |                                                              |                                                                                                        |
|                                                                                | Potential social costs (eg, stigma or discrimination)                                                                                                                                                                                                                                                                                                                                                                                                                                                                                                                                                                                                                                                                                                                                                                                                                                                                                                                                                                                                                                                                                                                                                                                                                                                                                                                                                                                                                                                                                                                                                                                                                                                                                                                                                                                                                                                                                                                                                                                                                                                                                                                                                                                                                                                                                                                                                                                                                                                                                                                                                                                                                                                                                                                                                                              |                       |                                                                                                                                                             |                                                                                                        |                                                                                                                                                                          |                                                                   |                                                             |                                                                                                               |                                                    |                                                       |                                                         |                                                                                                                 |          |                                                              |                                                                                                        |
|                                                                                | Potential financial benefits from monetary compensation                                                                                                                                                                                                                                                                                                                                                                                                                                                                                                                                                                                                                                                                                                                                                                                                                                                                                                                                                                                                                                                                                                                                                                                                                                                                                                                                                                                                                                                                                                                                                                                                                                                                                                                                                                                                                                                                                                                                                                                                                                                                                                                                                                                                                                                                                                                                                                                                                                                                                                                                                                                                                                                                                                                                                                            |                       |                                                                                                                                                             |                                                                                                        |                                                                                                                                                                          |                                                                   |                                                             |                                                                                                               |                                                    |                                                       |                                                         |                                                                                                                 |          |                                                              |                                                                                                        |
|                                                                                | Potential financial costs (eg, transportation costs, lost wages, treatment costs for research-related injuries)                                                                                                                                                                                                                                                                                                                                                                                                                                                                                                                                                                                                                                                                                                                                                                                                                                                                                                                                                                                                                                                                                                                                                                                                                                                                                                                                                                                                                                                                                                                                                                                                                                                                                                                                                                                                                                                                                                                                                                                                                                                                                                                                                                                                                                                                                                                                                                                                                                                                                                                                                                                                                                                                                                                    |                       |                                                                                                                                                             |                                                                                                        |                                                                                                                                                                          |                                                                   |                                                             |                                                                                                               |                                                    |                                                       |                                                         |                                                                                                                 |          |                                                              |                                                                                                        |
| Patients                                                                       | Potential clinical benefits from access to new interventions                                                                                                                                                                                                                                                                                                                                                                                                                                                                                                                                                                                                                                                                                                                                                                                                                                                                                                                                                                                                                                                                                                                                                                                                                                                                                                                                                                                                                                                                                                                                                                                                                                                                                                                                                                                                                                                                                                                                                                                                                                                                                                                                                                                                                                                                                                                                                                                                                                                                                                                                                                                                                                                                                                                                                                       |                       |                                                                                                                                                             |                                                                                                        |                                                                                                                                                                          |                                                                   |                                                             |                                                                                                               |                                                    |                                                       |                                                         |                                                                                                                 |          |                                                              |                                                                                                        |
|                                                                                | Potential clinical benefits from research-related improvements in the quality of routine clinical care                                                                                                                                                                                                                                                                                                                                                                                                                                                                                                                                                                                                                                                                                                                                                                                                                                                                                                                                                                                                                                                                                                                                                                                                                                                                                                                                                                                                                                                                                                                                                                                                                                                                                                                                                                                                                                                                                                                                                                                                                                                                                                                                                                                                                                                                                                                                                                                                                                                                                                                                                                                                                                                                                                                             |                       |                                                                                                                                                             |                                                                                                        |                                                                                                                                                                          |                                                                   |                                                             |                                                                                                               |                                                    |                                                       |                                                         |                                                                                                                 |          |                                                              |                                                                                                        |

|                                                                     |                                                                                                                                                                                                                                                                                                                                                                                                                                                                                                                                                                                                                                                                                                                                                                                                                                                                                                                                                                                      |                                                                                                                                                                                                             |
|---------------------------------------------------------------------|--------------------------------------------------------------------------------------------------------------------------------------------------------------------------------------------------------------------------------------------------------------------------------------------------------------------------------------------------------------------------------------------------------------------------------------------------------------------------------------------------------------------------------------------------------------------------------------------------------------------------------------------------------------------------------------------------------------------------------------------------------------------------------------------------------------------------------------------------------------------------------------------------------------------------------------------------------------------------------------|-------------------------------------------------------------------------------------------------------------------------------------------------------------------------------------------------------------|
|                                                                     |                                                                                                                                                                                                                                                                                                                                                                                                                                                                                                                                                                                                                                                                                                                                                                                                                                                                                                                                                                                      | Potential clinical benefits in the longer term from advances in scientific or medical knowledge that address local health needs or priorities (primarily fostered through local research capacity building) |
|                                                                     |                                                                                                                                                                                                                                                                                                                                                                                                                                                                                                                                                                                                                                                                                                                                                                                                                                                                                                                                                                                      | Potential clinical costs or harms if qualified clinicians are diverted from routine clinical care to clinical research                                                                                      |
|                                                                     | Wider community                                                                                                                                                                                                                                                                                                                                                                                                                                                                                                                                                                                                                                                                                                                                                                                                                                                                                                                                                                      | Potential financial benefits from cost-savings for healthcare payers (if research sponsors cover study treatments)                                                                                          |
|                                                                     |                                                                                                                                                                                                                                                                                                                                                                                                                                                                                                                                                                                                                                                                                                                                                                                                                                                                                                                                                                                      | Potential financial benefits from research-related economic activity (eg, research-related jobs or bonuses) and tax revenues                                                                                |
| 3. Are the regulatory protections justified, all things considered? | <p>Consider whether the regulatory protections are, all things considered, ethically justified.</p> <p>Specifically, weigh the estimated benefits against the estimated costs of the regulatory protections, consider to what extent the distribution of benefits and costs across different population groups might promote or curtail justice, and judge whether the costs to certain individuals or groups might amount to a violation of their rights.</p> <p>If, in this hypothetical scenario, the benefits of the regulatory protections do not outweigh the costs, the protections create new injustices or exacerbate existing ones, or the protections violate the rights of certain individuals or groups, there is reason to revise or amend the protections.</p> <p>If none of these ethical problems is evident and the protections' estimated benefits seem to outweigh the estimated costs, then implementing the regulatory protections is ethically justified.</p> |                                                                                                                                                                                                             |
